# Supplementary material
Source: HighWire-hosted journal article supplement (https://jnm.snmjournals.org/highwire/filestream/95555/field_highwire_adjunct_files/0/227140_Supplemental_Data.pdf)
Supplement: 227140_Supplemental_Data.pdf [file 227140_Supplemental_Data.pdf]

**Supplemental Table 1.** Characteristics of DAT studies. Values are n or mean (SD/range) unless specified otherwise.

| Study                          | Site | Groups | n (m/f)      | Age (yrs)  | Disease duration (yrs) | Motor UPDRS | Hoehn & Yahr | Injected dose (MBq) | Scan dur (min) | Tracer/ Scanner        | Analysis method                                                    |
|--------------------------------|------|--------|--------------|------------|------------------------|-------------|--------------|---------------------|----------------|------------------------|--------------------------------------------------------------------|
| Messa et al 1998(31)           | MIL  | PD     | 13 (8/5)     | 59 (13)    | 2.2 (1.4)              | -           | 2.2 (0.2)    | 130                 | 30             | <sup>123</sup> I-β-CIT | (str-occ)/occ                                                      |
|                                |      | PSP    | 5 (4/1)      | 66 (8)     | 3.8 (1.3)              | -           | 3 (0)        |                     |                | Ceraspet               |                                                                    |
| Kim et al 2000(32)             | SEO  | MSA-P  | 7 (4/3)      | 55 (9)     | -                      | -           | -            | 185-370             | 30             | <sup>123</sup> I-β-CIT | str/occ                                                            |
|                                |      | MSA-C  | 9 (5/4)      | 53 (7)     | 2.4 (1.5)              | -           | -            |                     |                | Triad XLT              |                                                                    |
| Parkinson Study Group 2000(33) | MUL  | PD     | 43 (30/13)   | 68 (8)     | -                      | -           | -            | 185                 | 30             | <sup>123</sup> I-β-CIT | (str-occ)/occ                                                      |
|                                |      | PSP    | 17 (10/7)    | 72 (6)     | -                      | -           | -            |                     |                | 5 different scanners   |                                                                    |
| Pirker et al 2000(12)          | VIE  | PD     | 48 (27/21)   | 68 (10)    | 8.6 (5.2)              | 35 (13)     | 3.5 (0.5)    | 89-197              | 40             | <sup>123</sup> I-β-CIT | (str-cer)/cer                                                      |
|                                |      | MSA    | 18 (7/11)    | 63 (11)    | 3.6 (2.2)              | 37 (10)     | 3.9 (0.5)    |                     |                | Siemens Multispect 3   |                                                                    |
|                                |      | PSP    | 8 (6/2)      | 65 (6)     | 3.3 (2.1)              | 32 (11)     | 4.3 (0.5)    |                     |                |                        |                                                                    |
|                                |      | CBS    | 4 (1/3)      | 68 (9)     | 2.3 (1.0)              | 42 (9)      | 3.8 (0.5)    |                     |                |                        |                                                                    |
| Varrone et al 2001(34)         | NEW  | PD     | 157 (102/55) | 61 (34-84) | 4.0 (0.3-23)           | 18 (6-40)   | 1.7 (1-4)    | 217                 | -              | <sup>123</sup> I-β-CIT | (str-occ)/occ                                                      |
|                                |      | MSA    | 26 (19/7)    | 66 (48-81) | 4.0 (0.2-10)           | 31 (10-73)  | 2.8 (1-5)    |                     |                | Pickler PRISM 3000 XP  |                                                                    |
| Kim et al 2002(35)             | TOR  | PD     | 12 (6/6)     | 62 (10)    | 3.5 (3.1)              | 18 (7)      | 1.9 (0.6)    | -                   | -              | <sup>123</sup> I-β-CIT | B <sub>max</sub> /K <sub>d</sub> V <sub>2</sub> (fcx as reference) |
|                                |      | MSA    | 7 (5/2)      | 62 (14)    | 3.4 (1.4)              | 50 (17)     | 4.0 (0)      |                     |                | Pickler PRISM 3000 XP  |                                                                    |
|                                |      | PSP    | 6 (5/1)      | 63 (7)     | 3.6 (0.8)              | 27 (11)     | 3.3 (0.8)    |                     |                |                        |                                                                    |
| Berding et al 2003(13)         | HAN  | PD     | 14 (7/7)     | 57 (9)     | 13 (5)                 | -           | 3.9 (0.7)    | -                   | 120            | <sup>123</sup> I-β-CIT | (str-ref)/ref (ref = occ and cer)                                  |
|                                |      | MSA    | 10 (2/8)     | 63 (7)     | 2.5 (1.7)              | 32 (12)     | 3.2 (1.1)    |                     |                | Siemens Multispect 3   |                                                                    |

|                             |     |       |             |         |           |         |           |         |    |                                                       |                                |
|-----------------------------|-----|-------|-------------|---------|-----------|---------|-----------|---------|----|-------------------------------------------------------|--------------------------------|
| Antonini et al<br>2003(36)  | MIL | PD    | 70 (-)      | 62 (13) | 5.0 (4.0) | -       | -         | 110-140 | -  | <sup>123</sup> I-FP-CIT<br>Prism 3000                 | (str-<br>occ)/occ              |
|                             |     | MSA-P | 10 (-)      | 60 (8)  | 4.0 (2.0) | -       | -         |         |    |                                                       |                                |
|                             |     | PSP   | 10 (-)      | 64 (8)  | 4.0 (3.0) | -       | -         |         |    |                                                       |                                |
| Lai et al<br>2004(37)       | TAO | PD    | 10 (3/7)    | 60 (16) | 1.9 (0.7) | 22 (10) | 1.8 (0.6) | 925     | -  | <sup>99m</sup> Tc-TRODAT-1<br>Siemens Multispect<br>3 | (str-<br>occ)/occ              |
|                             |     | CBS   | 5 (4/1)     | 59 (16) | 1.6 (0.9) | 30 (7)  | 1.9 (1.2) |         |    |                                                       |                                |
| Lu et al 2004<br>(38)       | TAI | PD    | 36 (20/16)  | 63 (7)  | 4.8 (3.5) | 30 (14) | 2.3 (0.9) | 925     | -  | <sup>99m</sup> Tc-TRODAT-1<br>Siemens Multispect<br>3 | (str-<br>occ)/occ              |
|                             |     | MSA-P | 30 (12/18)  | 62 (8)  | 4.5 (3.3) | 43 (15) | 3.5 (1.3) |         |    |                                                       |                                |
|                             |     | MSA-C | 19 (9/10)   | 64 (7)  | 4.0 (2.5) | 30 (13) | 3.7 (1.2) |         |    |                                                       |                                |
| Plotkin et al<br>2005(14)   | BER | PD    | 25 (18/7)   | 60 (13) | 4.0 (4.1) | -       | 1.8 (0.8) | 200     | -  | <sup>123</sup> I-FP-CIT<br>Siemens Multispect<br>3    | str/fcx                        |
|                             |     | MSA   | 13 (6/7)    | 64 (8)  | 4.0 (2.3) | -       | -         |         |    |                                                       |                                |
|                             |     | PSP   | 8 (6/2)     | 67 (7)  | 3.0 (1.9) | -       | -         |         |    |                                                       |                                |
|                             |     | CBS   | 9 (4/5)     | 63 (11) | 3.0 (1.6) | -       | -         |         |    |                                                       |                                |
| Scherfler et al<br>2005(39) | INN | PD    | 15 (10/5)   | 61 (7)  | 1.7 (0.8) | 22 (7)  | 1.9 (0.9) | 148-185 | 43 | <sup>123</sup> I-β-CIT<br>ADAC Vertex-Plus            | (str-<br>occ)/occ              |
|                             |     | MSA   | 15 (8/7)    | 62 (9)  | 2.0 (0.8) | 39 (11) | 2.6 (0.7) |         |    |                                                       |                                |
| Swanson et al<br>2005(40)   | PHI | PD    | 130 (87/43) | 63 (10) | 6.4 (5.4) | -       | -         | 740     | -  | <sup>99m</sup> Tc-TRODAT-1<br>Picker PRISM 3000<br>XP | (str-<br>ref)/ref <sup>B</sup> |
|                             |     | MSA-P | 25 (17/8)   | 66 (9)  | 4.9 (3.6) | -       | -         |         |    |                                                       |                                |
| Im et al<br>2006(26)        | SEO | PD    | 20 (10/10)  | 62 (7)  | 2.8 (1.7) | -       | 2 (0)     | 251     | 30 | <sup>123</sup> I-IPT<br>Triad XLT 24                  | (str-<br>occ)/occ              |
|                             |     | PSP   | 9 (6/3)     | 56 (11) | 1.8 (0.8) | -       | -         |         |    |                                                       |                                |
| Filippi et al<br>2006(41)   | ROM | PD    | 21 (12/9)   | 64 (8)  | 2.7 (1.9) | -       | -         | 185     | -  | <sup>123</sup> I-FP-CIT<br>Millenium VG               | (str-<br>occ)/occ              |
|                             |     | PSP   | 15 (9/6)    | 64 (6)  | 2.7 (1.2) | -       | -         |         |    |                                                       |                                |
|                             | INN | PD    | 17 (10/7)   | 62 (7)  | 2.0 (1.1) | 22 (7)  | -         | 148-185 | -  |                                                       |                                |

|                               |     |       |            |                     |           |         |           |         |       |                                             |                   |
|-------------------------------|-----|-------|------------|---------------------|-----------|---------|-----------|---------|-------|---------------------------------------------|-------------------|
| Seppi et al<br>2006(42)       |     | MSA   | 15 (8/7)   | 62 (9)              | 2.0 (0.8) | 39 (11) | -         |         |       | <sup>123</sup> I-β-CIT<br>ADAC Vertex-plus  | (str-<br>occ)/occ |
|                               |     | PSP   | 14 (6/8)   | 67 (-) <sup>A</sup> | 2.2 (0.7) | 36 (7)  | -         |         |       |                                             |                   |
| Roselli et al<br>2010(43)     | BAR | PD    | 15 (9/4)   | 78 (6)              | 3.5 (2.5) | 25 (8)  | 2.5 (-)   | 111     | 22    | <sup>123</sup> I-FP-CIT<br>GE Infinia       | (str-<br>occ)/occ |
|                               |     | PSP   | 10 (5/5)   | 66 (8)              | 1.5 (1.2) | 25 (19) | 1.8 (-)   |         |       |                                             |                   |
| Lin et al<br>2010(15)         | TAO | PD    | 10 (7/3)   | 61 (7)              | 4.6 (2.3) | 25 (9)  | 2.1 (0.5) | 925     | 40    | <sup>99m</sup> Tc-TRODAT-1<br>Siemens E.CAM | (str-<br>occ)/occ |
|                               |     | PSP   | 6 (2/4)    | 64 (3)              | 5.2 (1.9) | 47 (13) | 3.7 (1.0) |         |       |                                             |                   |
| Goebel et al<br>2011(44)      | INN | PD    | 15 (10/5)  | 61 (7)              | 1.7 (0.8) | 22 (7)  | -         | 148-185 | 43    | <sup>123</sup> I-β-CIT<br>ADAC Vertex-plus  | (str-<br>occ)/occ |
|                               |     | MSA   | 15 (8/7)   | 62 (9)              | 2.0 (0.8) | 39 (11) | -         |         |       |                                             |                   |
|                               |     | PSP   | 15 (7/8)   | 66 (7)              | 2.0 (0.9) | 35 (7)  | -         |         |       |                                             |                   |
| Cilia et al<br>2011(45)       | MIL | PD    | 37 (18/19) | 70 (5)              | 4.4 (2.9) | 22 (8)  | 1.9 (0.7) | 110-185 | 30-45 | <sup>123</sup> I-FP-CIT<br>Prism 3000       | (str-<br>occ)/occ |
|                               |     | CBS   | 36 (16/20) | 71 (7)              | 3.9 (1.6) | 39 (13) | 3.1 (0.8) |         |       |                                             |                   |
| Oh et al<br>2012(25)          | SEO | PD    | 49 (21/28) | 62 (11)             | 5.1 (6.0) | 20 (13) | 2.0 (1.0) | 185     | 10    | <sup>18</sup> F-FP-CIT<br>Biograph 40       | (str-<br>occ)/occ |
|                               |     | MSA   | 24 (8/16)  | 62 (11)             | 3.0 (1.7) | 35 (17) | 4.0 (1.2) |         |       |                                             |                   |
|                               |     | PSP   | 19 (9/10)  | 68 (8)              | 3.9 (2.1) | 26 (13) | 3.4 (1.3) |         |       |                                             |                   |
| Nocker et al<br>2012(46)      | INN | PD    | 11 (7/4)   | 61(6)               | 2.4 (1.2) | 19 (8)  | 1.9 (0.5) | 148-185 | 43    | <sup>123</sup> I-β-CIT<br>ADAC Vertex-plus  | (str-<br>occ)/occ |
|                               |     | MSA   | 8 (4/4)    | 60 (8)              | 2.4 (1.0) | 40 (5)  | 3.0 (0)   |         |       |                                             |                   |
| Jacobson Mo<br>et al 2013(47) | UME | PD    | 29 (18/11) | 74 (4)              | 1.5 (0.8) | 27 (11) | 2.0 (0.6) | 185     | 60    | <sup>123</sup> I-FP-CIT<br>GE Infinia       | str/occ           |
|                               |     | MSA   | 7 (-)      | 71 (14)             | 1.3 (0.9) | 22 (11) | 2.8 (1.0) |         |       |                                             |                   |
|                               |     | PSP   | 13 (-)     | 76 (9)              | 1.9 (1.5) | 34 (15) | 2.9 (1.0) |         |       |                                             |                   |
| Hammesfahr<br>et al 2016(48)  | DÜS | PD    | 18 (6/12)  | 65 (7)              | 1.9 (0.9) | 18 (11) | -         | 184     | -     | <sup>123</sup> I-FP-CIT<br>Prism 2000       | str/occ           |
|                               |     | CBS   | 19 (6/13)  | 67 (8)              | 2.0 (0.9) | 28 (15) | -         |         |       |                                             |                   |
| Kim et al<br>2016(49)         | DAE | MSA-P | 13 (-)     | -                   | -         | -       | -         | 185     | 10    | <sup>18</sup> F-FP-CIT<br>Biograph 40       | (str-<br>occ)/occ |
|                               |     | MSA-C | 21 (-)     | -                   | -         | -       | -         |         |       |                                             |                   |
|                               | AMS | PD    | 30 (16/14) | 66 (8)              | 3.6 (3.0) | 27 (12) | -         | 185     | 30    | <sup>123</sup> I-FP-CIT                     |                   |

|                            |     |       |            |         |           |         |           |     |   |                                                              |                   |
|----------------------------|-----|-------|------------|---------|-----------|---------|-----------|-----|---|--------------------------------------------------------------|-------------------|
| Joling et al<br>2017(50)   |     | MSA-P | 9 (2/7)    | 61 (10) | 3.2 (2.6) | 41 (23) | -         |     |   | E.Cam, Siemens                                               | (str-<br>cer)/cer |
|                            |     | MSA-C | 7 (3/4)    | 68 (11) | 3.6 (1.4) | 37 (8)  | -         |     |   |                                                              |                   |
|                            |     | PSP   | 13 (7/6)   | 70 (6)  | 5.7 (4.7) | 33 (12) | -         |     |   |                                                              |                   |
| Ohta et al<br>2017(51)     | OKA | PD    | 21 (8/13)  | 70 (11) | 6.3 (5.8) | 37 (12) | -         | -   | - | <sup>123</sup> I-FP-CIT                                      | -                 |
|                            |     | PSP   | 13 (8/5)   | 70 (6)  | 4.5 (3.3) | 37 (8)  | -         |     |   | -                                                            |                   |
| Saari et al<br>2017(52)    | TUR | PD    | 11 (10/1)  | 69 (7)  | 1.5 (1.5) | -       | -         | 185 | - | <sup>123</sup> I-FP-CIT                                      | (str-<br>occ)/occ |
|                            |     | MSA   | 5 (2/3)    | 53 (7)  | 1.3 (0.7) | -       | -         |     |   | <sup>123</sup> I-β-CIT<br>Picker, ADAC<br>Vertex, GE Infinia |                   |
| Nicastro et al<br>2018(53) | GEN | MSA-P | 28 (13/15) | 70 (10) | 2.6 (2.4) | 36 (11) | 3.0 (0.7) | 185 | - | <sup>123</sup> I-FP-CIT                                      | -                 |
|                            |     | MSA-C | 6 (4/2)    | 62 (8)  | 1.6 (1.1) | 20 (8)  | 2.8 (0.8) |     |   | GCA-9300A/UI<br>Toshiba                                      |                   |

MIL = Milan, Italy; SEO = Seoul, Korea; MUL = Multisite; VIE = Vienna, Austria; NEW = New Haven, CT, USA; TOR = Toronto, Canada; HAN = Hannover, Germany; TAO = Taoyuan, Taiwan; TAI = Taipei, Taiwan; BER = Berlin, Germany; INN = Innsbruck, Austria; PHI = Philadelphia, PA, USA; ROM = Rome, Italy; BAR = Bari, Italy; UME = Umeå, Sweden; DÜS = Düsseldorf, Germany; DAE = Daegu, Korea; AMS = Amsterdam, The Netherlands; OKA = Okayama, Japan; TUR = Turku, Finland; GEN = Geneva, Switzerland

<sup>A</sup> Extremely large SD for the age of PSP patients, an apparent typographical error

<sup>B</sup> Reference region = supratentorial structures above the basal ganglia

**Supplemental Table 2.** Characteristics of AADC studies. All included studies performed with 6-<sup>18</sup>F-fluoro-L-dopa as the tracer. Values are n or mean (SD/range) unless specified otherwise. None of the studies reported motor UPDRS values.

| Study                   | Site | Groups | n (m/f)   | Age (yrs)  | Disease duration (yrs) | Hoehn & Yahr | Injected dose (MBq) | Scan duration (min) | Scanner        | Analysis method   |
|-------------------------|------|--------|-----------|------------|------------------------|--------------|---------------------|---------------------|----------------|-------------------|
| Brooks et al 1990a(54)  | LON  | PD     | 8 (7/1)   | 64 (6)     | 10.6 (8.7)             | 3.0 (0.8)    | 111-185             | 90                  | CTI 931/08/012 | Ki <sup>occ</sup> |
|                         |      | MSA    | 10 (6/4)  | 59 (9)     | 4.4 (3.2)              | 3.6 (1.0)    |                     |                     |                |                   |
| Brooks et al 1990b(55)  | LON  | PD     | 16 (11/5) | 56 (11)    | 9.2 (5.1)              | 2.7 (1-4)    | 74-185              | 90                  | CTI 981/08/012 | Ki <sup>occ</sup> |
|                         |      | MSA    | 18 (13/5) | 56 (10)    | 4.1 (3)                | 3.2 (1-5)    |                     |                     |                |                   |
|                         |      | PSP    | 10 (10/0) | 68 (4)     | 3.5 (2.2)              | 3.3 (2-5)    |                     |                     |                |                   |
| Burn et al 1994(56)     | LON  | PD     | 28 (-/-)  | 61 (38-77) | 7.2 (0.5-20)           | - (1-4)      | 111-185             | 94                  | CTI 931/08/012 | Ki <sup>occ</sup> |
|                         |      | MSA    | 25 (-/-)  | 58 (40-73) | 4.4 (1-10)             | - (2-5)      |                     |                     |                |                   |
|                         |      | PSP    | 10 (-/-)  | 68 (62-75) | 3.5 (0.5-8)            | - (3-4)      |                     |                     |                |                   |
| Otsuka et al 1995(57)   | FUK  | PD     | 4 (-/-)   | -          | -                      | -            | 110-240             | 127                 | Headtome III   | ROI/cer           |
|                         |      | PSP    | 3 (0/3)   | 56 (6)     | 1.7 (0.6)              | -            |                     |                     |                |                   |
|                         |      | CBS    | 2 (1/1)   | 65 (5)     | 4.0 (0)                | -            |                     |                     |                |                   |
| Otsuka et al 1997(11)   | FUK  | PD     | 15 (8/7)  | 49 (10)    | 7.0 (7.1)              | 1.9 (0.9)    | 110-240             | 127                 | Headtome III   | ROI/occ           |
|                         |      | MSA    | 9 (4/5)   | 52 (14)    | 6.4 (5.5)              | 2.4 (0.5)    |                     |                     |                |                   |
| Antonini et al 1997(58) | VIL  | PD     | 10 (7/3)  | 63 (5)     | 10 (5)                 | 3.7 (0.6)    | 90-160              | 124                 | CTI 933/04-16  | Ki <sup>occ</sup> |
|                         |      | MSA    | 9 (5/4)   | 57 (7)     | 5 (2)                  | 3.9 (0.9)    |                     |                     |                |                   |

LON = London, UK; FUK = Fukuoka, Japan; VIL = Villigen, Switzerland, Disdur = disease duration, ROI = region of interest, occ = occipital cortex, cer = cerebellum

**Supplemental Table 3.** MSA subgroups in included studies. Values are n.

| Study               | MSA total | Subgroups <sup>A</sup> |            |     | Comment                                           |
|---------------------|-----------|------------------------|------------|-----|---------------------------------------------------|
|                     |           | MSA-P/SND              | MSA-C/OPCA | SDS |                                                   |
| Brooks et al. 1990a | 10        | -                      | -          | -   | -                                                 |
| Brooks et al. 1990b | 18        | -                      | -          | -   | -                                                 |
| Burn et al 1994     | 25        | -                      | -          | -   | -                                                 |
| Otsuka et al 1997   | 9         | 4                      | 5          | -   | No separate mean values reported for subgroups    |
| Antonini et al 1997 | 9         | -                      | -          | -   | -                                                 |
| Kim et al. 2000     | 16        | 7                      | 9          | -   | Separate mean values reported for MSA-P and MSA-C |
| Pirker et al. 2000  | 19        | 15                     | 3          | -   | No separate mean values reported for subgroups    |
| Varrone et al. 2001 | 26        | 14                     | -          | 12  | Separate mean values reported for SND and SDS     |
| Kim et al. 2002     | 7         | 7                      | -          | -   | -                                                 |

|                        |    |    |    |   |                                                   |
|------------------------|----|----|----|---|---------------------------------------------------|
| Berding et al 2003     | 10 | 7  | 3  | - | No separate mean values reported for subgroups    |
| Antonini et al. 2003   | 10 | 10 | -  | - | -                                                 |
| Lu et al 2004          | 49 | 30 | 19 | - | Separate mean values reported for MSA-P and MSA-C |
| Plotkin et al 2005     | 13 | 8  | 5  | - | No separate mean values reported for subgroups    |
| Swanson et al. 2005    | 25 | 25 |    |   |                                                   |
| Scherfler et al 2005   | 15 | 15 | -  | - | -                                                 |
| Seppi et al 2006       | 15 | 15 | -  | - | -                                                 |
| Goebel et al 2011      | 15 | 15 | -  | - | -                                                 |
| Oh et al 2012          | 24 | 24 | -  | - | -                                                 |
| Nocker et al 2012      | 8  | 8  | -  | - | -                                                 |
| Jacobson Mo et al 2013 | 7  | -  | -  | - | -                                                 |
| Kim et al. 2016        | 34 | 13 | 21 | - | Separate mean values reported for MSA-P and MSA-C |
| Joling et al 2017      | 16 | 9  | 7  | - | Separate mean values reported for MSA-P and MSA-C |
| Saari et al 2017       | 5  | -  | -  | - | -                                                 |
| Nicastro et al 2018    | 34 | 28 | 6  | - | Separate mean values reported for MSA-P and MSA-C |

MSA = multiple system atrophy, MSA-P = parkinsonism variant multiple system atrophy, SND = striatonigral degeneration, MSA-C = cerebellar variant multiple system atrophy, OPCA = olivopontocerebellar atrophy, SDS = Shy-Drager syndrome

<sup>A</sup>Studies that did not report subgroups were included in the MSA-P group for the analysis (4 AADC studies and 2 DAT studies).

**Supplemental Table 4.** Quality of the included studies (Newcastle-Ottawa Scale).

| Study | Case definition | Age-/sex-differences between groups | PET/SPECT imaging methodology & resolution | Disease duration | UPDRS/UMSARS/HY-scale | Analysis method | Total Score |
|-------|-----------------|-------------------------------------|--------------------------------------------|------------------|-----------------------|-----------------|-------------|
|-------|-----------------|-------------------------------------|--------------------------------------------|------------------|-----------------------|-----------------|-------------|

|                      |   |   |   |   |   |   |   |
|----------------------|---|---|---|---|---|---|---|
| Brooks et al 1990a   | * | * | - | * | * | * | 5 |
| Brooks et al 1990b   | * | - | - | * | * | * | 4 |
| Burn et al 1994      | * | - | - | * | - | * | 3 |
| Otsuka et al 1995    | * | * | - | - | - | * | 3 |
| Otsuka et al 1997    | * | * | - | * | * | * | 5 |
| Antonini et al 1997  | * | * | - | * | * | * | 5 |
| Messa et al 1998     | * | * | - | * | * | * | 5 |
| Kim et al 2000       | * | * | - | - | - | * | 3 |
| PSG 2000             | * | * | - | - | - | * | 3 |
| Pirker et al 2000    | * | * | * | * | * | * | 6 |
| Varrone et al 2001   | * | * | * | * | * | * | 6 |
| Kim et al 2002       | * | * | * | * | * | - | 5 |
| Berding et al 2003   | * | - | * | * | * | * | 5 |
| Antonini et al 2003  | * | - | * | * | - | * | 4 |
| Lu et al 2004        | * | * | * | * | * | * | 6 |
| Lai et al 2004       | * | - | * | * | * | * | 5 |
| Plotkin et al 2005   | * | * | * | * | - | - | 4 |
| Swanson et al 2005   | * | * | * | * | - | - | 4 |
| Scherfler et al 2005 | * | * | * | * | * | * | 6 |
| Im et al 2006        | * | * | * | * | - | * | 5 |
| Filippi et al 2006   | * | * | * | * | - | * | 5 |
| Seppi et al 2006     | * | * | * | * | * | * | 6 |
| Roselli et al 2010   | * | - | * | * | * | * | 5 |
| Lin et al 2010       | * | * | * | * | * | * | 6 |



|                       |   |   |   |   |   |   |   |
|-----------------------|---|---|---|---|---|---|---|
| Goebel et al 2011     | * | * | * | * | * | * | 6 |
| Cilia et al 2011      | * | * | * | * | * | * | 6 |
| Oh et al 2012         | * | * | * | * | * | * | 6 |
| Nocker et al 2012     | * | * | * | * | * | * | 6 |
| Jakobson et al 2013   | * | - | * | * | * | * | 5 |
| Kim et al 2016        | * | - | * | - | - | * | 3 |
| Hammesfahr et al 2016 | * | * | * | * | * | * | 6 |
| Joling et al 2017     | * | - | * | * | * | * | 5 |
| Ohta et al 2017       | * | * | * | * | * | - | 5 |
| Saari et al 2017      | * | - | * | * | - | * | 4 |
| Nicastro et al 2018   | * | * | * | * | * | - | 5 |

**Supplemental Table 5. Clinical diagnostic criteria for PD, MSA, PSP and CBS in the included studies.**

| Study                      | Diagnostic criteria                                                                                                                                                                                                                                                                                                                                                                                                                                                                                                                                                                                                                                                                                                                                                                                                |
|----------------------------|--------------------------------------------------------------------------------------------------------------------------------------------------------------------------------------------------------------------------------------------------------------------------------------------------------------------------------------------------------------------------------------------------------------------------------------------------------------------------------------------------------------------------------------------------------------------------------------------------------------------------------------------------------------------------------------------------------------------------------------------------------------------------------------------------------------------|
| Messa et al 1998           | PD: Calne et al. Ann Neurol 1992;32:S125-S127, PSP: NINDS-SPSP International workshop criteria (Litvan et al. Neurology 1996;47:1-9)                                                                                                                                                                                                                                                                                                                                                                                                                                                                                                                                                                                                                                                                               |
| Kim et al 2000             | MSA-C: Criteria modified from Yamaguchi et al. J Neurol Sci 1994;125:56-61, MSA-P: Quinn, J Neurol Neurosurg Psychiatry 1989;special suppl:8-89                                                                                                                                                                                                                                                                                                                                                                                                                                                                                                                                                                                                                                                                    |
| Parkinson Study Group 2000 | <p>PD:</p> <ol style="list-style-type: none"> <li>1. At least two of the following: resting tremor, rigidity, bradykinesia, postural reflex impairment, and freezing phenomenon</li> <li>2. Hoehn and Yahr stage of 1.0 to 3.028</li> <li>3. Has a known positive response to antiparkinsonian medications</li> <li>4. No other known or suspected cause of parkinsonism</li> </ol> <p>PSP:</p> <ol style="list-style-type: none"> <li>1. At least two of the following: axial rigidity, bradykinesia, postural reflex impairment, speech impairment</li> <li>2. Ophthalmoparesis including restriction of downgaze</li> <li>3. No significant response to antiparkinsonian medication</li> <li>4. Ability to ambulate without assistance</li> <li>5. No other known or suspected cause of parkinsonism</li> </ol> |

|                     |                                                                                                                                                                                                                                                                                                                                                                                                                                                                                                                |
|---------------------|----------------------------------------------------------------------------------------------------------------------------------------------------------------------------------------------------------------------------------------------------------------------------------------------------------------------------------------------------------------------------------------------------------------------------------------------------------------------------------------------------------------|
| Pirker et al 2000   | MSA: Quinn, Movement Disorders 3 1994;262-281, PSP: NINDS-SPSP International workshop criteria (Litvan et al. Neurology 1996;47:1-9), CBD: Litvan et al. Neurology 1997;48:119-125                                                                                                                                                                                                                                                                                                                             |
| Varrone et al 2001  | PD: Age older than 35 years, and at least two of the following: bradykinesia, resting tremor, rigidity, postural instability, or freezing phenomena (one of which is rest tremor or bradykinesia).<br>MSA: A known negative, unsustained, or inadequate response to L-dopa, with at least two of the following: resting tremor, bradykinesia, postural reflex impairment, or freezing phenomenon; and with a concurrent presence of cerebellar dysfunction, symptomatic autonomic failure, or pyramidal signs. |
| Kim et al 2002      | PD: Hughes et al J Neurol Neurosurg Psychiatry 1992;55:181-184, MSA: Quinn, Movement Disorders 3 1994;262-281, PSP: NINDS-SPSP International workshop criteria (Litvan et al. Neurology 1996;47:1-9)                                                                                                                                                                                                                                                                                                           |
| Berding et al 2003  | Not reported.                                                                                                                                                                                                                                                                                                                                                                                                                                                                                                  |
| Antonini et al 2003 | Not reported.                                                                                                                                                                                                                                                                                                                                                                                                                                                                                                  |
| Lai et al 2004      | CBD: Lang et al. In: Calne DB (editor). Neurodegenerative Disease. Philadelphia: W.B. Saunders 1994;877-894                                                                                                                                                                                                                                                                                                                                                                                                    |
| Lu et al 2004       | PD: Calne et al. Ann Neurol 1992;32:S125-S127, MSA: Gilman et al. J Neurol Sci 1999;163:94-98                                                                                                                                                                                                                                                                                                                                                                                                                  |
| Plotkin et al 2005  | PD: Hughes et al J Neurol Neurosurg Psychiatry 1992;55:181-184, MSA: Gilman et al. J Neurol Sci 1999;163:94-98, PSP: NINDS-SPSP International workshop criteria (Litvan et al. Neurology 1996;47:1-9)                                                                                                                                                                                                                                                                                                          |

|                      |                                                                                                                                                                                                          |
|----------------------|----------------------------------------------------------------------------------------------------------------------------------------------------------------------------------------------------------|
|                      |                                                                                                                                                                                                          |
| Scherfler et al 2005 | PD: Hughes et al. J Neurol Neurosurg Psychiatry 1992;55:181-184, MSA: Gilman et al. Clin Auton Res 1998;8:359-362                                                                                        |
| Swanson et al 2005   | PD: Ward & Gibbs. In: Streifler et al (eds). Advances in neurology: anatomy, pathology and therapy. New York: Raven, 1990, MSA: Gilman et al. J Neurol Sci 1999;163:94-98                                |
| Im et al 2006        | PD: CAPIT Committee, Mov Disord 1992;7:2-13, PSP: NINDS-SPSP International workshop criteria (Litvan et al. Neurology 1996;47:1-9)                                                                       |
| Filippi et al 2006   | PD: Hughes et al. J Neurol Neurosurg Psychiatry 1992;55:181-184, PSP: NINDS-SPSP International workshop criteria (Litvan et al. Neurology 1996;47:1-9)                                                   |
| Seppi et al 2006     | PD: Hughes et al. J Neurol Neurosurg Psychiatry 1992;55:181-184, PSP: NINDS-SPSP International workshop criteria (Litvan et al. Neurology 1996;47:1-9), MSA: Gilman et al. Clin Auton Res 1998;8:359-362 |
| Roselli et al 2010   | PSP: NINDS-SPSP International workshop criteria (Litvan et al. Neurology 1996;47:1-9)                                                                                                                    |
| Lin et al 2010       | PD: Hughes et al. J Neurol Neurosurg Psychiatry 1992;55:181-184, PSP: NINDS-SPSP International workshop criteria (Litvan et al. Neurology 1996;47:1-9)                                                   |
| Goebel et al 2011    | PD: Hughes et al. J Neurol Neurosurg Psychiatry 1992;55:181-184, PSP: NINDS-SPSP International workshop criteria (Litvan et al. Neurology 1996;47:1-9), MSA: Gilman et al. Clin Auton Res 1998;8:359-362 |
| Cilia et al 2011     | CBS: Mahapatra et al. Lancet Neurol 2004;3:736-743                                                                                                                                                       |
| Oh et al 2012        |                                                                                                                                                                                                          |

|                        |                                                                                                                                                                                                                  |
|------------------------|------------------------------------------------------------------------------------------------------------------------------------------------------------------------------------------------------------------|
|                        | PD: Hughes et al. J Neurol Neurosurg Psychiatry 1992;55:181-184, PSP: NINDS-SPSP International workshop criteria (Litvan et al. Neurology 1996;47:1-9), MSA: Gilman et al. Neurology 2008;71:670-676             |
| Nocker et al 2012      | PD: Hughes et al. J Neurol Neurosurg Psychiatry 1992;55:181-184, MSA: Gilman et al. Neurology 2008;71:670-676                                                                                                    |
| Jacobson Mo et al 2013 | MSA: Gilman et al. J Neurol Sci 1999;163:94-98, PSP: NINDS-SPSP International workshop criteria (Litvan et al. Neurology 1996;47:1-9), clinically uncertain parkinsonian syndromes (CUPS) at the time of imaging |
| Hammesfahr et al 2016  | PD: Hughes et al. J Neurol Neurosurg Psychiatry 1992;55:181-184, CBS: Mathew et al J Neurol Neurosurg Psychiatry 2012;83:405-410 and Armstrong et al. Neurology 2013;80:496-503                                  |
| Kim et al 2016         | MSA: Gilman et al. Neurology 2008;71:670-676                                                                                                                                                                     |
| Joling et al 2017      | PD: Hughes et al. J Neurol Neurosurg Psychiatry 1992;55:181-184, PSP: NINDS-SPSP International workshop criteria (Litvan et al. Neurology 1996;47:1-9), MSA: Gilman et al. Neurology 2008;71:670-676             |
| Ohta et al 2017        | PSP: NINDS-SPSP International workshop criteria (Litvan et al. Neurology 1996;47:1-9)                                                                                                                            |
| Saari et al 2017       | Neuropathological diagnoses                                                                                                                                                                                      |
| Nicastro et al 2018    | MSA: Gilman et al. Neurology 2008;71:670-676                                                                                                                                                                     |
| Brooks et al 1990a     | Individual clinical details reported                                                                                                                                                                             |
| Brooks et al 1990b     | Individual clinical details reported                                                                                                                                                                             |

|                     |                                                                                                        |
|---------------------|--------------------------------------------------------------------------------------------------------|
|                     |                                                                                                        |
| Burn et al 1994     | PD: Hughes et al. J Neurol Neurosurg Psychiatry 1992;55:181-184                                        |
| Otsuka et al 1995   | Individual clinical details reported                                                                   |
| Otsuka et al 1997   | MSA-P: Fearnley & Lees, Brain 1990;113:1823-1842, individual clinical details reported                 |
| Antonini et al 1997 | PD: Hughes et al. J Neurol Neurosurg Psychiatry 1992;55:181-184, individual clinical details reported. |

**Supplemental Table 6.** Summary of DAT results (hemispheric values and ratios).  $g$  = Hedges'  $g$ , CI = 95% confidence interval for  $g$ ,  $n$  = number of studies/number of patients,  $I^2$  = heterogeneity index. AI = asymmetry index. There were no available studies that have compared MSA-C patients to PSP or CBS patients. Data were insufficient also for MSA-P vs. CBS comparison. Statistically significant comparisons are highlighted with bold text.

|                                  | PD<br>vs<br>MSA-P                                      | PD<br>vs<br>PSP                                                                                    | PD<br>vs<br>MSA-C             | PD<br>vs<br>CBS                                        | MSA-P<br>vs<br>PSP                                     | MSA-P<br>vs<br>MSA-C          | PSP<br>vs<br>CBS              |
|----------------------------------|--------------------------------------------------------|----------------------------------------------------------------------------------------------------|-------------------------------|--------------------------------------------------------|--------------------------------------------------------|-------------------------------|-------------------------------|
| <b>Caudate<br/>Contralateral</b> | $g=-0.61$<br>CI=-2.35 to 1.13<br>$n=3/268, I^2=74.9\%$ | <b><math>g=-1.05</math></b><br><b>CI=-2.09 to -0.01</b><br><b><math>n=6/181, I^2=78.5\%</math></b> | Insufficient data<br>$n=1/55$ | $g=-0.36$<br>CI=-1.63 to 0.91<br>$n=3/122, I^2=49.4\%$ | Insufficient data<br>$n=1/13$                          | Insufficient data<br>$n=1/49$ | Insufficient data<br>$n=1/17$ |
| <b>Caudate<br/>Ipsilateral</b>   | $g=-0.76$<br>CI=-2.52 to 1.01<br>$n=3/268, I^2=77.6\%$ | <b><math>g=-1.35</math></b><br><b>CI=-2.45 to -0.25</b><br><b><math>n=6/181, I^2=79.0\%</math></b> | Insufficient data<br>$n=1/55$ | $g=-0.24$<br>CI=-0.85 to 0.37<br>$n=3/122, I^2=0.0\%$  | Insufficient data<br>$n=1/13$                          | Insufficient data<br>$n=1/49$ | Insufficient data<br>$n=1/17$ |
| <b>Putamen<br/>Anterior</b>      | $g=-0.40$<br>CI=-3.11 to 2.32<br>$n=3/247, I^2=90.2\%$ | <b><math>g=-0.66</math></b><br><b>CI=-1.25 to -0.07</b><br><b><math>n=4/133, I^2=0.0\%</math></b>  | Insufficient data<br>$n=0$    | Insufficient data<br>$n=0$                             | $g=-0.05$<br>CI=-8.74 to 8.65<br>$n=2/56, I^2=79.8\%$  | Insufficient data<br>$n=1/34$ | Insufficient data<br>$n=0$    |
| <b>Putamen<br/>Posterior</b>     | $g=-0.12$<br>CI=-1.57 to 1.34<br>$n=4/266, I^2=85.4\%$ | $g=-0.23$<br>CI=-1.30 to 0.83<br>$n=4/133, I^2=63.6\%$                                             | Insufficient data<br>$n=0$    | Insufficient data<br>$n=0$                             | $g=0.19$<br>CI=-11.29 to 11.66<br>$n=2/56, I^2=87.4\%$ | Insufficient data<br>$n=1/34$ | Insufficient data<br>$n=0$    |
| <b>Putamen<br/>Contralateral</b> | $g=-0.10$<br>CI=-4.71 to 4.50<br>$n=2/249, I^2=80.0\%$ | $g=-0.63$<br>CI=-2.04 to 0.77<br>$n=4/145, I^2=82.3\%$                                             | Insufficient data<br>$n=1/55$ | $g=0.48$<br>CI=-0.48 to 1.44<br>$n=3/122, I^2=24.8\%$  | Insufficient data<br>$n=0$                             | Insufficient data<br>$n=1/49$ | Insufficient data<br>$n=1/17$ |
| <b>Putamen<br/>Ipsilateral</b>   | $g=-0.58$<br>CI=-3.20 to 2.05                          | $g=-1.40$<br>CI=-3.63 to 0.82                                                                      | Insufficient data<br>$n=1/55$ | $g=0.57$<br>CI=-0.53 to 1.67                           | Insufficient data<br>$n=0$                             | Insufficient data<br>$n=1/49$ | Insufficient data<br>$n=1/17$ |

|                                |                                                       |                                                       |                          |                                                       |                             |                          |                             |
|--------------------------------|-------------------------------------------------------|-------------------------------------------------------|--------------------------|-------------------------------------------------------|-----------------------------|--------------------------|-----------------------------|
|                                | n=2/249, $I^2=38.0\%$                                 | n=4/145, $I^2=89.9\%$                                 |                          | n=3/122, $I^2=41.1\%$                                 |                             |                          |                             |
| <b>Putamen AI</b>              | $g=0.02$<br>CI=-0.89 to 0.93<br>n=4/264, $I^2=74.9\%$ | Insufficient data<br>n=1/31                           | Insufficient data<br>n=0 | Insufficient data<br>n=1/73                           | Insufficient data<br>n=1/29 | Insufficient data<br>n=0 | Insufficient data<br>n=0    |
| <b>Putamen / Caudate ratio</b> | $g=0.36$<br>CI=-4.70 to 5.42<br>n=2/263, $I^2=75.0\%$ | $g=1.08$<br>CI=-0.85 to 3.01<br>n=4/185, $I^2=88.8\%$ | Insufficient data<br>n=0 | $g=1.08$<br>CI=-0.88 to 3.03<br>n=3/101, $I^2=62.0\%$ | Insufficient data<br>n=1/20 | Insufficient data<br>n=0 | Insufficient data<br>n=1/17 |

**Supplemental Table 7.** Summary of AADC results.  $g$  = Hedges'  $g$ , CI = 95% confidence interval for  $g$ ,  $n$  = number of studies/number of patients. All other AADC comparisons had insufficient data.

|         | <b>PD vs MSA-P</b>                       | <b>PD vs PSP</b>                        | <b>MSA-P vs PSP</b>                     |
|---------|------------------------------------------|-----------------------------------------|-----------------------------------------|
| Caudate | $g=-0.54$<br>CI=-1.23 to 0.14<br>n=5/148 | $g=-1.50$<br>CI=-5.79 to 2.79<br>n=2/64 | $g=-0.91$<br>CI=-2.77 to 0.96<br>n=2/63 |
| Putamen | $g=-0.01$<br>CI=-0.62 to 0.60<br>n=5/148 | $g=-0.41$<br>CI=-4.10 to 3.28<br>n=2/64 | $g=-0.07$<br>CI=-1.83 to 1.69<br>n=2/63 |



**Supplemental Table 8.** Associations of moderators with Hedges'  $g$  (the difference between PD and MSA-P/PSP) in meta-regression analyses. The only significant association in meta-regressions was detected using HY stage as the moderator in PD vs. MSA-P caudate comparison (highlighted).

| Comparison  | Region  | Moderator        | $\beta$ (95% CI)           | n (studies) |
|-------------|---------|------------------|----------------------------|-------------|
| PD vs MSA-P | Caudate | Disease duration | 0.12 (0.0 to 0.24)         | 12          |
|             |         | <b>HY stage</b>  | <b>0.74 (0.19 to 1.29)</b> | <b>7</b>    |
|             |         | Motor UPDRS      | 0.03 (-0.01 to 0.07)       | 9           |
|             | Putamen | Disease duration | -0.35 (-1.75 to 1.06)      | 10          |
|             |         | HY stage         | 0.90 (-1.95 to 3.76)       | 5           |
|             |         | Motor UPDRS      | 0.027 (-0.03 to 0.08)      | 8           |
| PD vs PSP   | Caudate | Disease duration | 0.23 (-0.28 to 0.73)       | 10          |
|             |         | HY stage         | 0.96 (-4.0 to 5.9)         | 4           |
|             |         | Motor UPDRS      | 0.089 (-0.02 to 0.19)      | 6           |
|             | Putamen | Disease duration | 0.060 (-0.84 to 0.96)      | 7           |
|             |         | HY stage         | 1.58 (-10.1 to 13.2)       | 2           |
|             |         | Motor UPDRS      | 0.059 (-0.03 to 0.14)      | 5           |
